# Supplementary material
Source: Springer Nature journal article supplement (https://www.springermedizin.de/resource/supplementary/13618_2013_107_MOESM5_ESM.pdf/9681114)

Enamel

Pulp

Dentin

Root Canal

Blood Vessel

Nerve

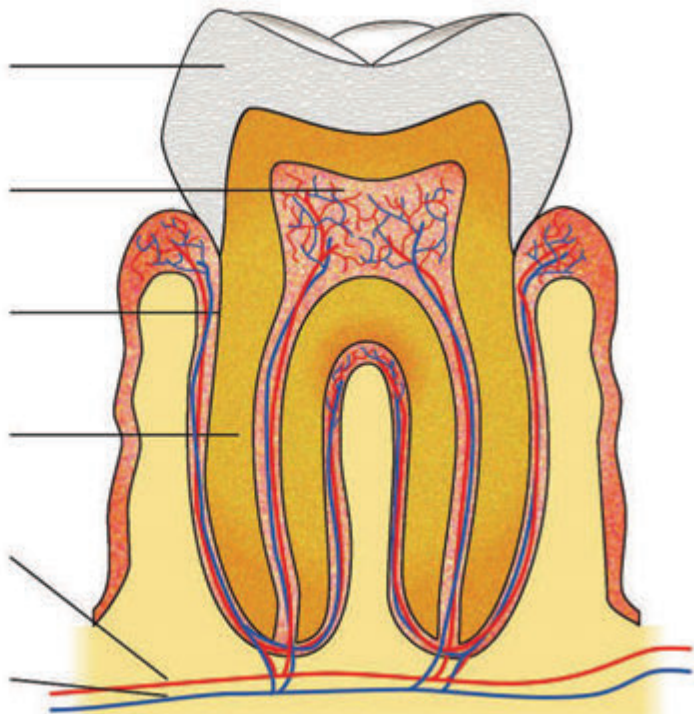

Supplement: MOESM5 [file 9681114]
